# Supplementary material for: Sympathetic activity–associated periodic repolarization dynamics predict mortality following myocardial infarction
Source: JCI journal article supplement (doi:10.1172/jci70085), 2014-03-18
Supplement: sd1 [file 1]

# Periodic Repolarization Dynamics: A New Electrocardiographic Phenomenon and Its Implications

Konstantinos D Rizas<sup>1</sup>, MD, Tuomo Nieminen<sup>2</sup>, MD, Petra Barthel<sup>3</sup>, MD, Christine S Zürn<sup>1</sup>, MD, Mika Kähönen<sup>4</sup>, MD, PhD, Jari Viik<sup>5</sup>, PhD, Terho Lehtimäki<sup>6</sup>, MD, PhD, Kjell Nikus<sup>7</sup>, MD, Christian Eick<sup>1</sup>, MD, Tim O Greiner<sup>8</sup>, DVM, Hans P Wendel<sup>8</sup>, PhD, Peter Seizer<sup>1</sup>, MD, Jürgen Schrieck<sup>1</sup>, MD, Meinrad Gawaz<sup>1</sup>, MD, Georg Schmidt<sup>3</sup>, MD and Axel Bauer<sup>1\*</sup>, MD

<sup>1</sup> Medizinische Klinik III, Abteilung für Kardiologie und Herz-Kreislaufkrankungen, Eberhard Karls University, Tübingen, Germany

<sup>2</sup> Division of Cardiology, Helsinki University Central Hospital, Helsinki, Finland

<sup>3</sup> 1. Medizinische Klinik, Technische Universität München, Germany

<sup>4</sup> Department of Clinical Physiology, University of Tampere and Tampere University Hospital, Tampere, Finland.

<sup>5</sup> Department of Biomedical Engineering, Tampere University of Technology, Tampere, Finland

<sup>6</sup> Department of Clinical Chemistry, Fimlab Laboratories, School of Medicine at University of Tampere, Tampere, Finland.

<sup>7</sup> Heart Centre, Department of Cardiology, Tampere University Hospital, Tampere, Finland

<sup>8</sup> Department of Thoracic, Cardiac and Vascular Surgery, Eberhard Karls University, Tübingen, Germany

**Disclosures:** All authors have declared that no conflict of interest exists.

**Role of the funding sources**

The sponsors of the study had no role in study design, data collection, data analysis, data interpretation, or writing of the report. The corresponding author had final responsibility for the decision to submit for publication.

**Address for correspondence:**

Prof. Dr. med. Axel Bauer

Medizinische Klinik III, Abteilung für Kardiologie und Herz-Kreislaferkrankungen

Eberhard-Karls-Universität Tübingen

Otfried-Müller-Str. 10

72076 Tübingen

Germany

Tel: +49 7071 29 82922

Fax: +49 7071 29 4550

Email: [axel.bauer@med.uni-tuebingen.de](mailto:axel.bauer@med.uni-tuebingen.de)

## Supplemental Figures

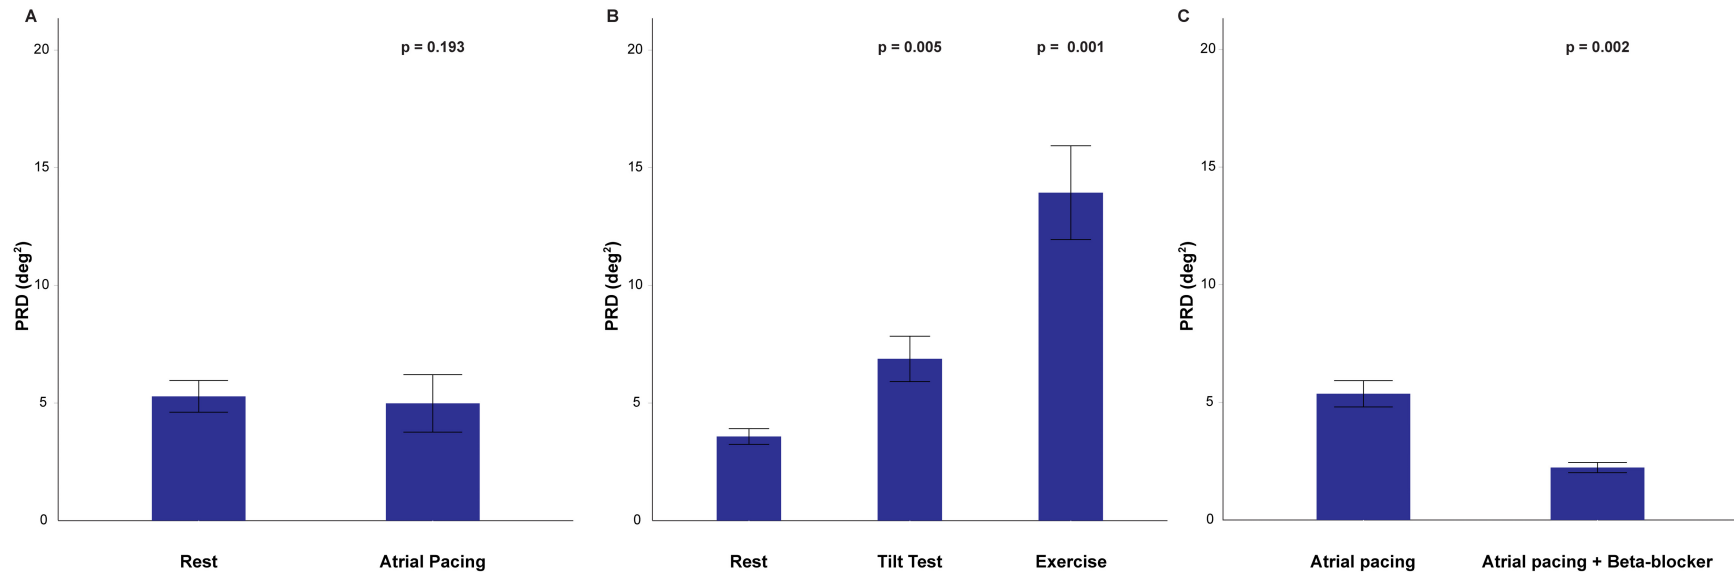

### Supplemental Figure 1

**(A)** Effects of fixed atrial pacing on PRD in 10 patients undergoing a clinically indicated electrophysiological study. Pacing with constant heart rate had no significant effect on the PRD ( $5.28 \pm 0.67$  vs.  $4.99 \pm 1.22$ ,  $p = 0.193$ ). **(B)** Effects of 45° head-up tilt and low-intensity exercise on PRD in 11 healthy volunteers. Both tilt test and exercise significantly increased PRD from  $3.57 \pm 0.33 \text{ deg}^2$  to  $6.88 \pm 0.96 \text{ deg}^2$  ( $p = 0.005$ ) and  $13.94 \pm 2.00 \text{ deg}^2$  ( $p = 0.001$ ) respectively. **(C)** Effects of pharmacological adrenergic blockade on PRD in 10 patients undergoing a clinically indicated electrophysiological study. Fixed atrial pacing was used to ensure constant heart rate. Intravenous administration of 0.1mg/kg metoprolol caused significant suppression of PRD in all subjects ( $5.36 \pm 0.56$  vs.  $2.23 \pm 0.22$ ,  $p = 0.002$ ). All barplots illustrate mean values with error bars representing the standard error of the mean.

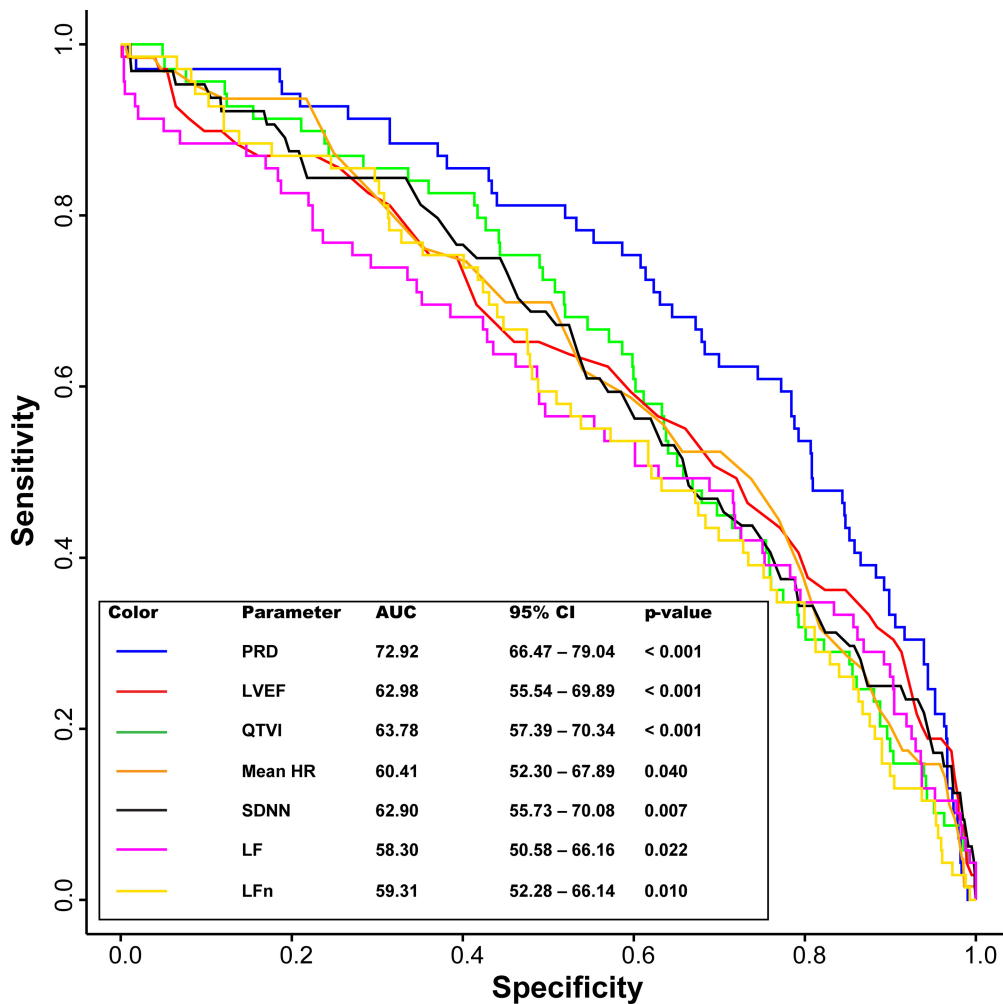

### Supplemental Figure 2

Receiver-operator characteristic curves for predicting 5-year mortality yielded by various risk variables in a cohort of 908 patients surviving an acute myocardial infarction. PRD = periodic repolarization dynamics, LF = low frequency power of heart rate variability ( $p = 0.005$  for the difference from PRD), LFn = LF in normalized units ( $p = 0.003$  for the difference from PRD), LVEF = left ventricular ejection fraction ( $p = 0.014$  for the difference from PRD), mean HR = mean heart rate ( $p = 0.004$  for the difference from PRD), QTVI = QT variability index ( $p = 0.007$  for the difference from PRD), SDNN = standard deviation of all NN intervals ( $p = 0.038$  for the difference from PRD).

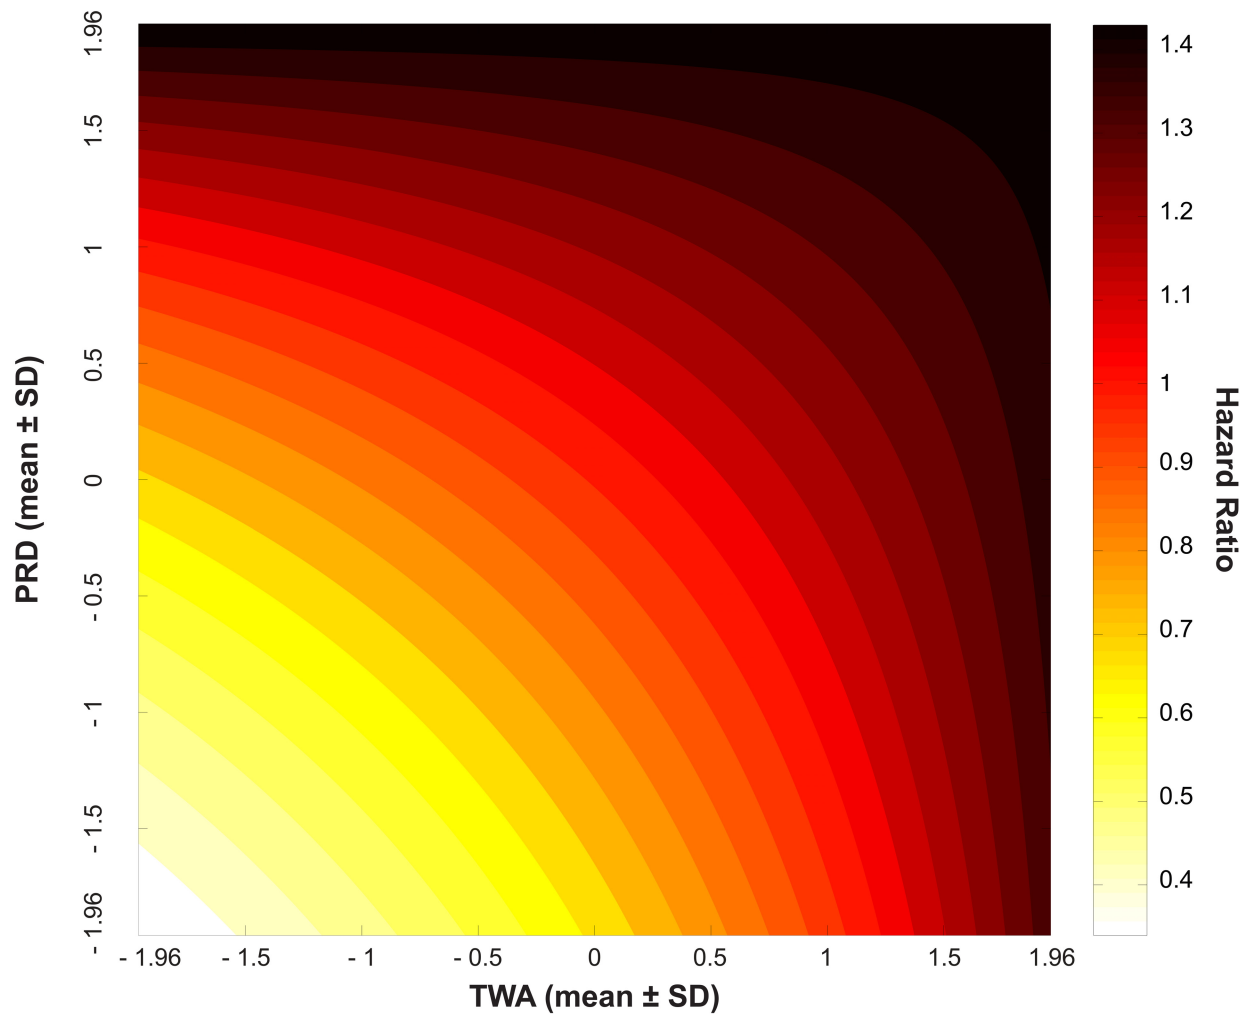

### Supplemental Figure 3

Response surface plot illustrating the relative hazard ratios (HR) assessed for different levels of PRD and TWA for all-cause mortality. The HR for mean PRD and mean TWA was defined as the reference and depicted in the center of the graph (relative HR = 1). The HR for different combinations of PRD and TWA was calculated and compared to the reference HR (color bar). We considered changes in PRD and TWA at  $\pm 1.96$  standard deviations around the mean value. PRD affected the HR at all levels of TWA, which proves its incremental prognostic information.

## Cartesian coordinates

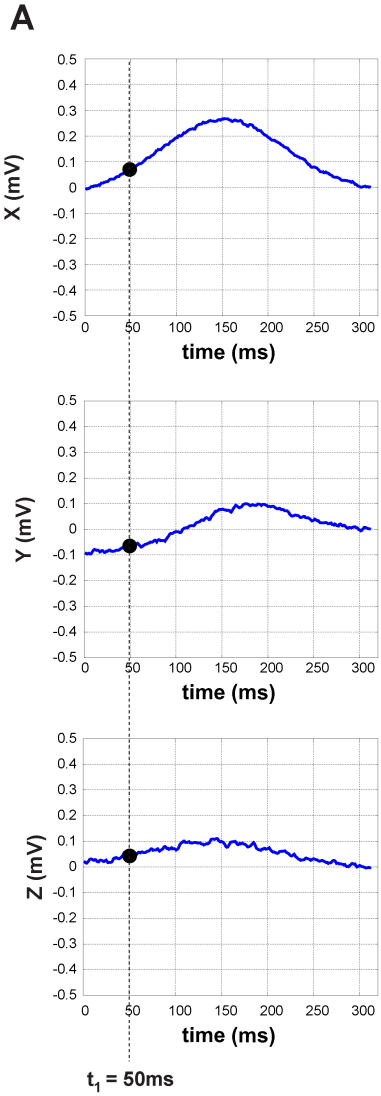

## Polar coordinates

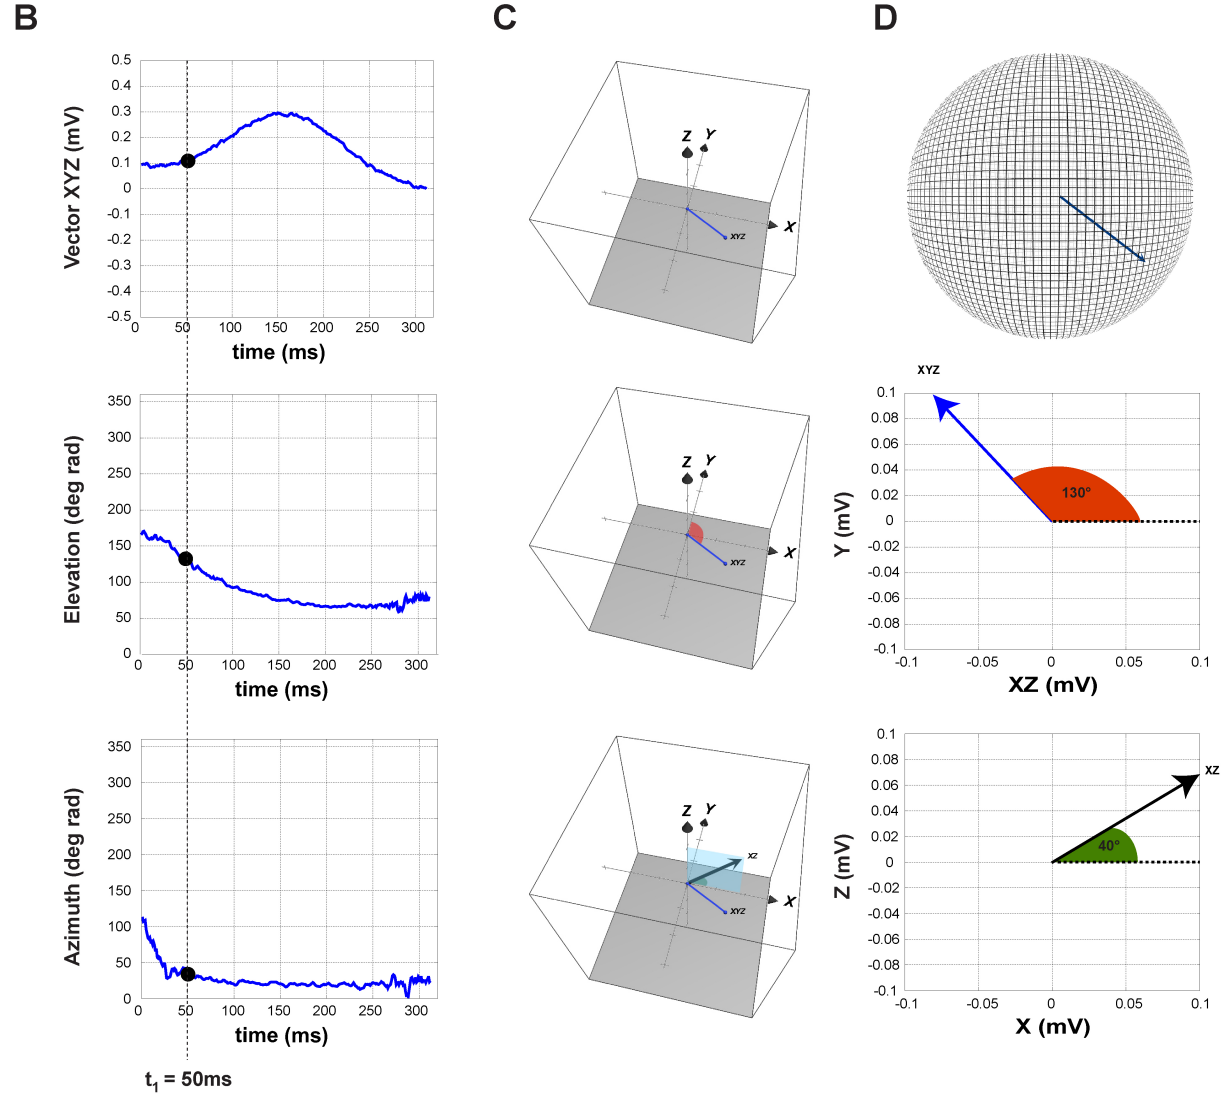

#### **Supplemental Figure 4**

**(A)** A Cartesian system of coordinates (X,Y,Z) was transformed into **(B)** a time series of polar coordinates defined by two angles (elevation and azimuth) and the “resultant-force” amplitude XYZ. **(C)** For a given time point  $t_1$ , elevation and azimuth were assessed as follows: the vector XYZ (defined by X, Y, and Z in the Cartesian coordinate system) was plotted in space (upper panel) and decomposed into two orthogonal vectors, one on the Y-axis (middle panel) and one on the transverse (XZ) plane (lower panel). **(D)** The angle between the vector and the Y-axis was termed the elevation (middle panel), with an angle of  $0^\circ$  defined as the vector pointing in the caudal direction. The angle between the vector on the transverse plane and the X-axis was called the azimuth (lower panel), with  $0^\circ$  corresponding to the left and  $90^\circ$  corresponding to the forward direction.

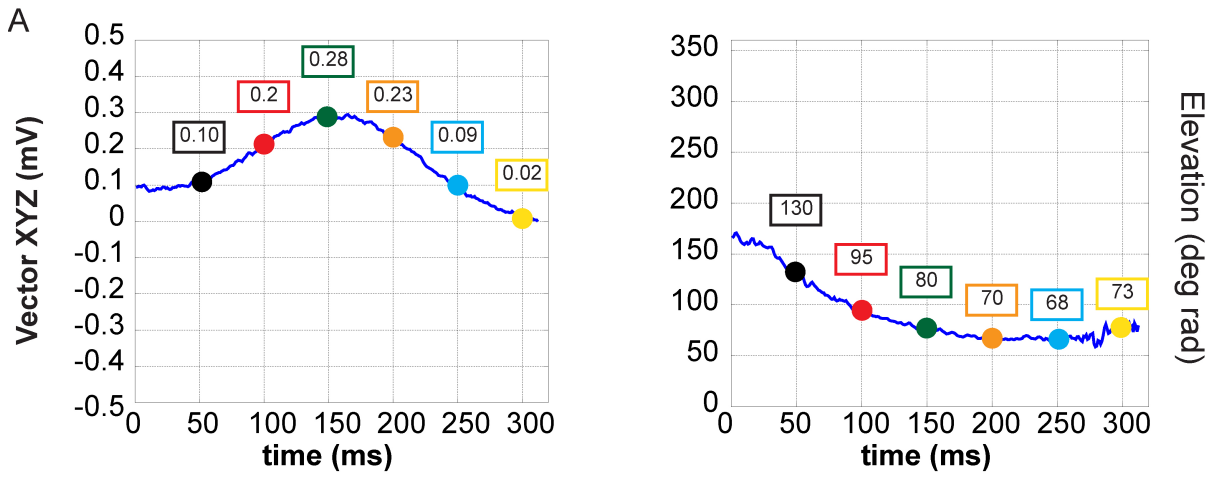

$$WAE = \frac{(130 * 0.1) + (95 * 0.2) + (80 * 0.28) + (70 * 0.23) + (68 * 0.09) + (73 * 0.02)}{(0.1 + 0.2 + 0.28 + 0.23 + 0.09 + 0.02)} = 84.87^\circ$$

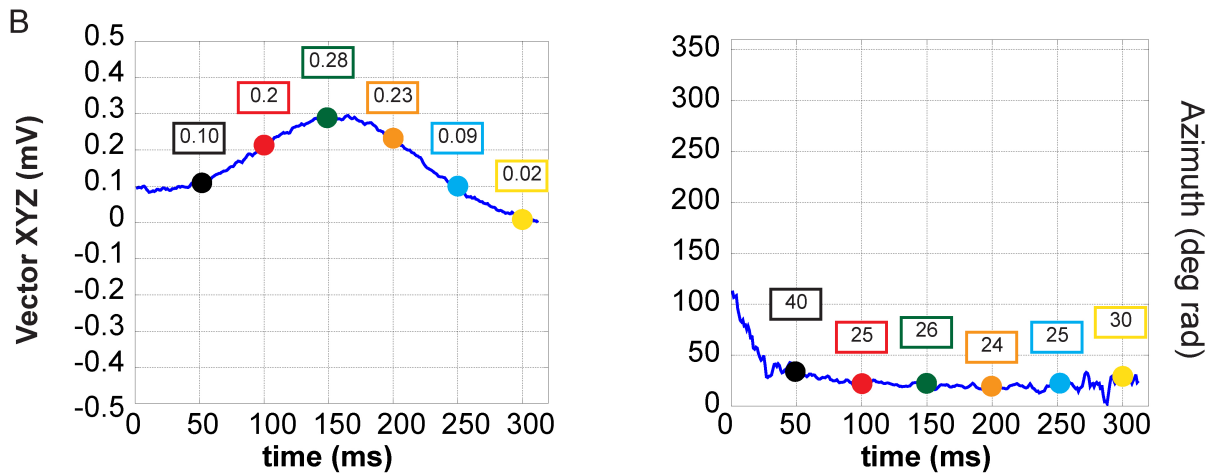

$$WAA = \frac{(40 * 0.1) + (25 * 0.2) + (26 * 0.28) + (24 * 0.23) + (25 * 0.09) + (30 * 0.02)}{(0.1 + 0.2 + 0.28 + 0.23 + 0.09 + 0.02)} = 26.79^\circ$$

### Supplemental Figure 5

Example calculation of the weight-averaged azimuth (WAA) and the weight-averaged elevation (WEE).



### A Projections of a repolarization vector

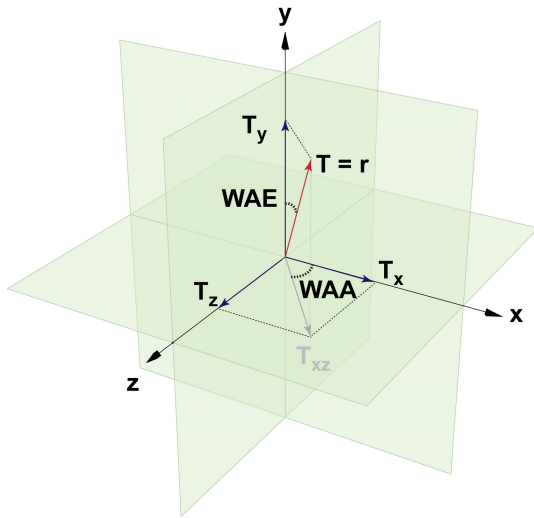

$$T_x = r * \sin(WAE) * \cos(WAA)$$

$$T_y = r * \cos(WAE)$$

$$T_z = r * \sin(WAE) * \sin(WAA)$$

### B Angle between two repolarization vectors

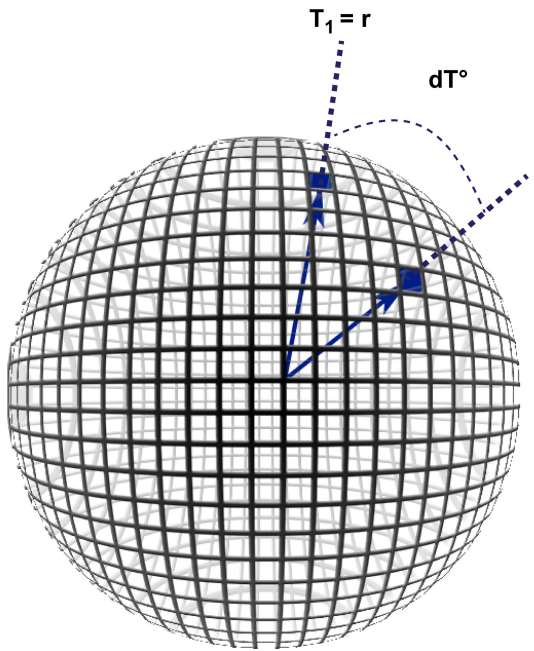

$$|T_1| * |T_2| * \cos(dT^\circ) = T_{1x} * T_{2x} + T_{1y} * T_{2y} + T_{1z} * T_{2z}$$

$$r^2 * \cos(dT^\circ) = T_{1x} * T_{2x} + T_{1y} * T_{2y} + T_{1z} * T_{2z}$$

$$T_{1x} * T_{2x} = r^2 * \sin(WAE_1) * \cos(WAA_1) * \sin(WAE_2) * \cos(WAA_2)$$

$$T_{1y} * T_{2y} = r^2 * \cos(WAE_1) * \cos(WAE_2)$$

$$T_{1z} * T_{2z} = r^2 * \sin(WAE_1) * \sin(WAA_1) * \sin(WAE_2) * \sin(WAA_2)$$

$$dT^\circ = \text{acos} \left( \sin(WAE_1) * \cos(WAA_1) * \sin(WAE_2) * \cos(WAA_2) + \cos(WAE_1) * \cos(WAE_2) + \sin(WAE_1) * \sin(WAA_1) * \sin(WAE_2) * \sin(WAA_2) \right)$$

### C Example

$$T_1: WAE_1 = 30 \text{ and } WAA_1 = 45$$

$$T_2: WAE_2 = 35 \text{ and } WAA_2 = 50$$

$$dT^\circ = \text{acos} \left( \sin(30) * \cos(45) * \sin(35) * \cos(50) + \cos(30) * \cos(35) + \sin(30) * \sin(45) * \sin(35) * \sin(50) \right)$$

$$dT^\circ = \text{acos} \left( 0.1304 + 0.7094 + 0.1553 \right) = 5.672^\circ$$

### Supplemental Figure 6

Calculation of the angle  $dT^\circ$  between two successive repolarization vectors  $T_1$  and  $T_2$ .

**(A)** Projection of a vector  $T$  on the three orthogonal axes  $X$ ,  $Y$  and  $Z$ . **(B)** Two repolarization vectors  $T_1$  and  $T_2$  with length  $r$  are projected on a virtual sphere. The dot product of the two vectors is used to calculate the angle  $dT^\circ$  between  $T_1$  and  $T_2$ . **(C)** Example calculation for angle  $dT^\circ$  between vectors  $T_1$  and  $T_2$ .

## Supplemental Tables

### Supplemental Table 1

Comparison between low-frequency oscillations of heart rate and repolarization in the physiological cohorts. Variables are presented as mean value  $\pm$  standard error of the mean.

| <b>Atrial-pacing cohort</b>         |                  |                |                  |                |                 |                |
|-------------------------------------|------------------|----------------|------------------|----------------|-----------------|----------------|
|                                     | <b>PRD</b>       | <b>p-value</b> | <b>ln (LF)</b>   | <b>p-value</b> | <b>LFn</b>      | <b>p-value</b> |
| Resting*                            | 5.28 $\pm$ 0.67  |                | 6.13 $\pm$ 0.43  |                | 0.72 $\pm$ 0.05 |                |
| Fixed atrial pacing                 | 4.99 $\pm$ 1.22  | 0.193          | 0.45 $\pm$ 0.38  | 0.002          | 0.18 $\pm$ 0.03 | 0.002          |
| <b>Adrenergic-activation cohort</b> |                  |                |                  |                |                 |                |
|                                     | <b>PRD</b>       | <b>p-value</b> | <b>ln (LF)</b>   | <b>p-value</b> | <b>LFn</b>      | <b>p-value</b> |
| Resting*                            | 3.57 $\pm$ 0.33  |                | 7.09 $\pm$ 0.33  |                | 0.48 $\pm$ 0.05 |                |
| Tilt-table testing                  | 6.88 $\pm$ 0.96  | 0.005          | 7.29 $\pm$ 0.18  | 0.465          | 0.72 $\pm$ 0.05 | 0.002          |
| Exercise testing                    | 13.94 $\pm$ 2.00 | 0.001          | 4.06 $\pm$ 0.34  | 0.001          | 0.42 $\pm$ 0.08 | 0.413          |
| <b>Adrenergic-blockade cohort</b>   |                  |                |                  |                |                 |                |
|                                     | <b>PRD</b>       | <b>p-value</b> | <b>ln (LF)</b>   | <b>p-value</b> | <b>LFn</b>      | <b>p-value</b> |
| Atrial pacing*                      | 5.36 $\pm$ 0.56  |                | -1.03 $\pm$ 0.84 |                | 0.23 $\pm$ 0.10 |                |
| Atrial pacing &<br>Beta-blocker     | 2.23 $\pm$ 0.22  | 0.002          | -0.98 $\pm$ 0.70 | 0.461          | 0.17 $\pm$ 0.04 | 0.945          |

\* reference condition; p-value denotes difference from reference

## Supplemental Table 2

Multivariable models including periodic repolarization dynamics (PRD) for the prediction of 5-year total mortality in a cohort of 908 patients surviving acute myocardial infarction.

| <b>Model 1: Clinical marker and PRD</b>                     |                              |                |
|-------------------------------------------------------------|------------------------------|----------------|
| <b>Risk variable</b>                                        | <b>Hazard ratio (95% CI)</b> | <b>p-value</b> |
| GRACE score $\geq 120$                                      | 4.28 (2.47 – 7.40)           | < 0.001        |
| PRD $\geq 5.75$ deg <sup>2</sup>                            | 3.49 (2.14 – 5.70)           | < 0.001        |
| Relative IDI                                                | 85%                          | < 0.001        |
| <b>Model 2: Clinical marker, structural marker, and PRD</b> |                              |                |
| <b>Risk variable</b>                                        | <b>Hazard ratio (95% CI)</b> | <b>p-value</b> |
| GRACE score $\geq 120$                                      | 4.02 (2.34 – 7.06)           | < 0.001        |
| LVEF $\leq 35\%$                                            | 2.27 (1.31 – 3.95)           | 0.003          |
| PRD $\geq 5.75$ deg <sup>2</sup>                            | 3.14 (1.91 – 5.18)           | < 0.001        |
| Relative IDI                                                | 45%                          | < 0.001        |

**Model 3: Clinical marker, HRV, and PRD**

| <b>Risk variable</b>             | <b>Hazard ratio (95% CI)</b> | <b>p-value</b> |
|----------------------------------|------------------------------|----------------|
| GRACE score $\geq 120$           | 4.21 (2.43 – 7.30)           | < 0.001        |
| Mean HR > 75 bpm                 | 1.22 (0.62 – 2.40)           | 0.557          |
| SDNN $\leq 70$ ms                | 1.69 (0.95 – 3.02)           | 0.075          |
| PRD $\geq 5.75$ deg <sup>2</sup> | 3.37 (2.06 – 5.52)           | < 0.001        |
| Relative IDI                     | 67%                          | < 0.001        |

**Model 4: Clinical marker, structural marker, HRV, and PRD**

| <b>Risk variable</b>             | <b>Hazard ratio (95% CI)</b> | <b>p-value</b> |
|----------------------------------|------------------------------|----------------|
| GRACE score $\geq 120$           | 3.94 (2.26 – 6.86)           | < 0.001        |
| LVEF $\leq 35\%$                 | 2.31 (1.33 – 4.01)           | 0.003          |
| Mean HR > 75 bpm                 | 1.20 (0.62 – 2.33)           | 0.591          |
| SDNN $\leq 70$ ms                | 1.74 (0.98 – 3.09)           | 0.057          |
| PRD $\geq 5.75$ deg <sup>2</sup> | 3.03 (1.84 – 5.01)           | < 0.001        |
| Relative IDI                     | 38%                          | < 0.001        |

| <b>Model 5: Clinical marker, structural marker, HRV, PRD, and respiratory rate</b> |                              |                |
|------------------------------------------------------------------------------------|------------------------------|----------------|
| <b>Risk variable</b>                                                               | <b>Hazard ratio (95% CI)</b> | <b>p-value</b> |
| GRACE score $\geq 120$                                                             | 3.52 (2.01 – 6.16)           | < 0.001        |
| LVEF $\leq 35\%$                                                                   | 2.29 (1.33 – 3.95)           | 0.003          |
| Mean HR > 75 bpm                                                                   | 1.13 (0.58 – 2.20)           | 0.710          |
| SDNN $\leq 70$ ms                                                                  | 1.77 (1.00 – 3.14)           | 0.048          |
| Respiratory rate (continuous)                                                      | 1.17 (1.07 – 1.29)           | < 0.001        |
| PRD $\geq 5.75$ deg <sup>2</sup>                                                   | 3.01 (1.83 – 4.94)           | < 0.001        |
| Relative IDI                                                                       | 30%                          | < 0.001        |

HR = heart rate, HRV = heart rate variability, GRACE = Global Registry of Acute Coronary Events, LVEF = left ventricular ejection fraction, Relative IDI = relative integrated discrimination improvement in various models after the addition periodic repolarization dynamics in the multivariable logistic regression model, SDNN = standard deviation of all normal-to-normal intervals.

GRACE score, LVEF, mean HR and SDNN were dichotomized at predefined cutoff values of  $\geq 120$ ,  $\leq 35\%$ ,  $> 75$  bpm, and  $\leq 70$  ms respectively. The upper quartile of PRD ( $5.75 \text{ deg}^2$ ) was used for dichotomization. Respiratory rate was included as scalar factor in the multivariable model. The GRACE score combines several clinical risk factors, including patient age, history of previous myocardial infarction and congestive heart failure, ST-segment deviation, elevated cardiac enzymes, renal impairment, systolic blood pressure and HR upon admission, and percutaneous coronary interventions during the hospital stay.
